# Supplementary material for: Application of sulfur-doped carbon coating on the surface of Li3V2(PO4)3composites to facilitate Li-ion storage as cathode materials
Source: Royal Society of Chemistry journal article supplement (doi:10.1039/c5ta00323g), 2015-01-01
Supplement: c5ta00323g1.pdf [file c5ta00323g1.pdf]

**Supplementary Information for**  
**“Application of Sulfur-doped Carbon Coating on the Surface of**  
 **$\text{Li}_3\text{V}_2(\text{PO}_4)_3$  Composite Facilitate Li-ion Storage as Cathode**  
**Materials” by**

Cong Wang, Ziyang Guo, Wei Shen, Aili Zhang, Qunjie Xu, Haimei Liu\*, Yonggang

Wang\*

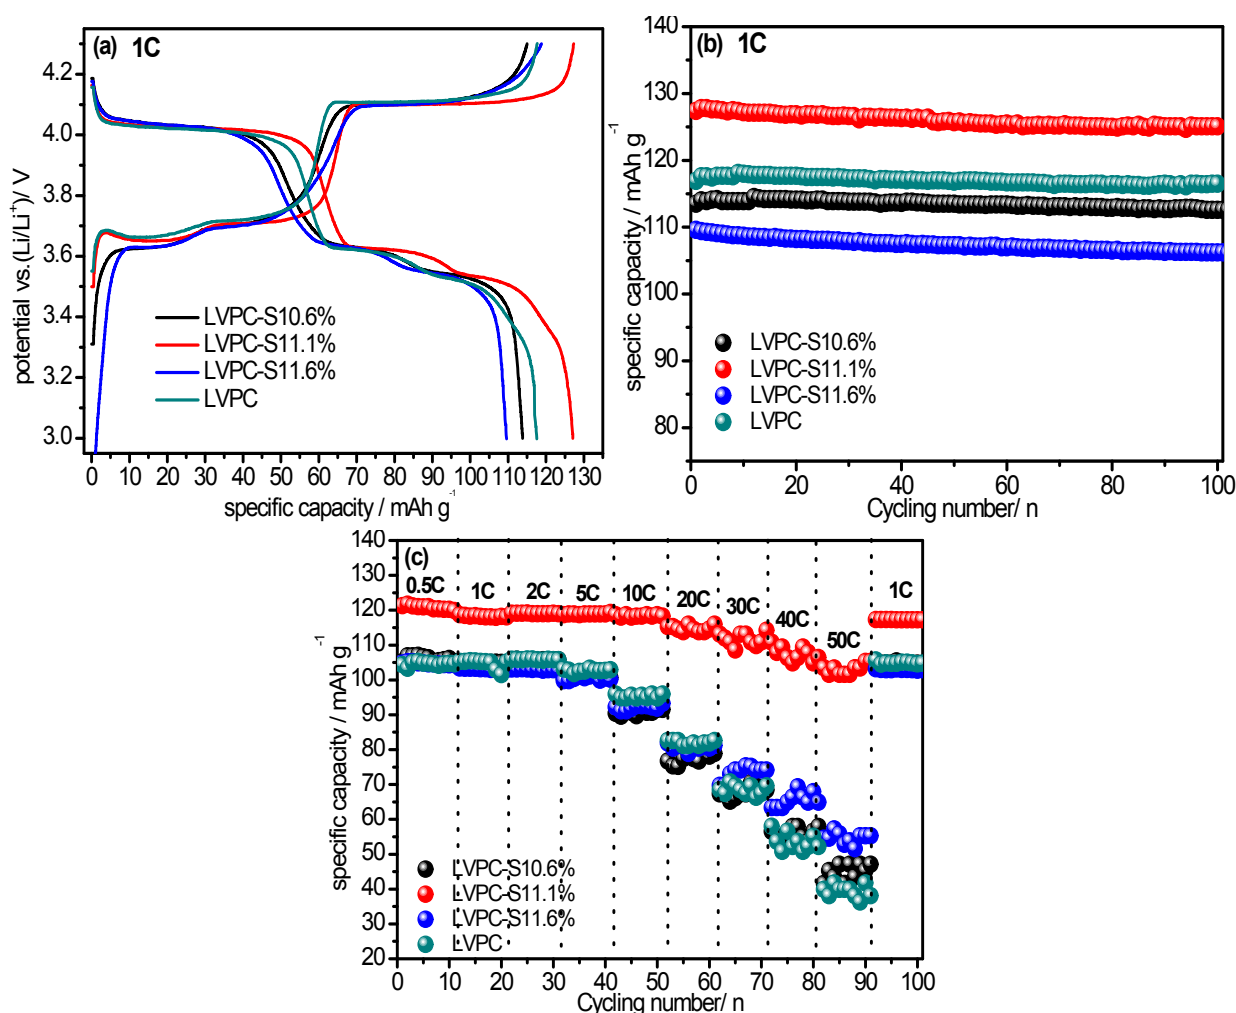

**Fig. S1** (a) Initial charge-discharge curves and (b) cycling performances of LVPC and various LVPC-S samples which with various S contents at 1C; (c) rate performances of LVPC and various LVPC-S samples which with various S contents; all the tests were employed in the potential window of 3.0 - 4.3 V (vs. Li/Li<sup>+</sup>).

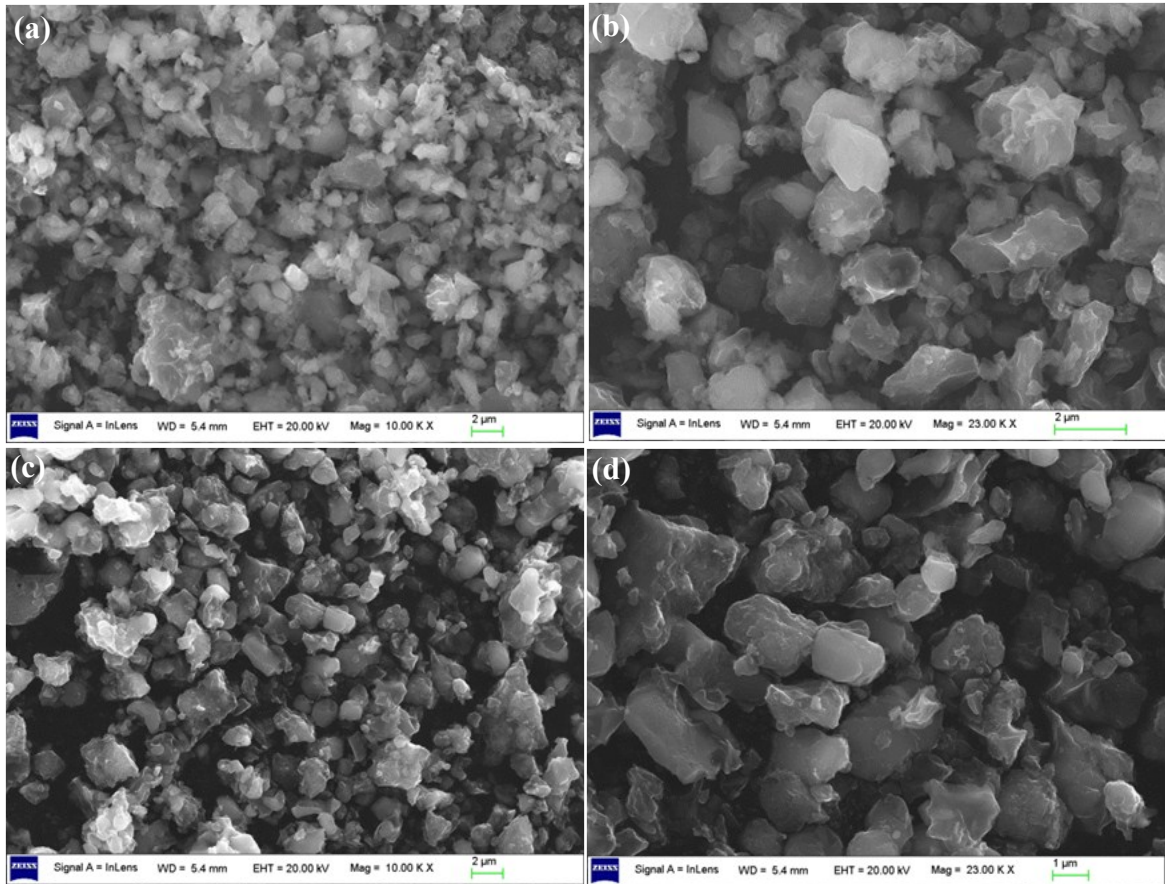

**Fig. S2** SEM images of (a) and (b) LVPC-S11.1% and (c) and (d) LVPC.

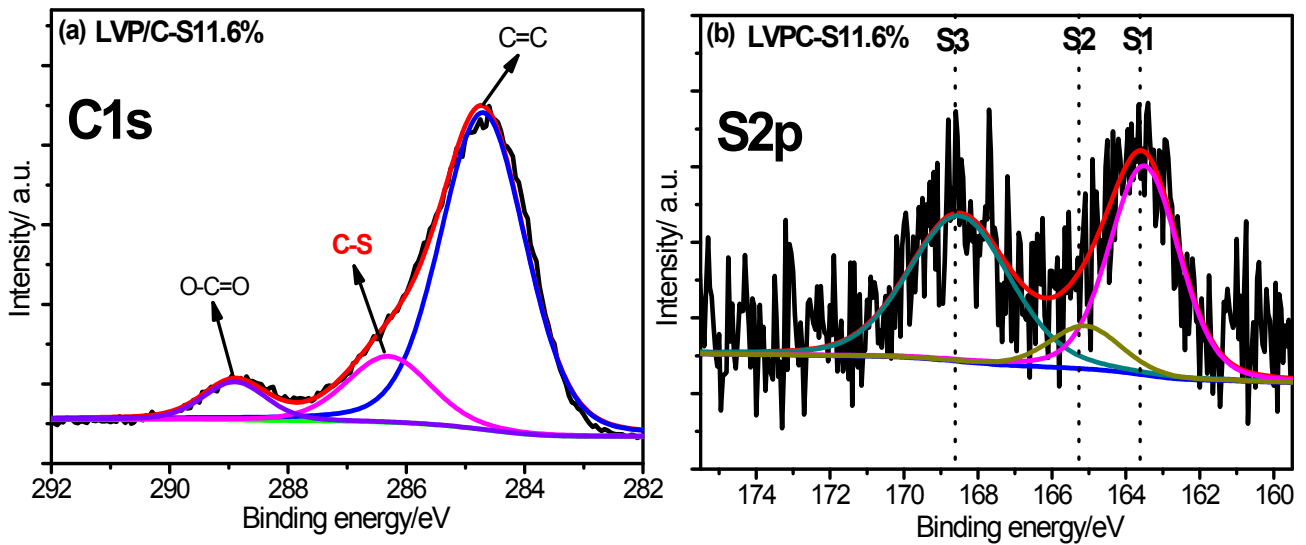

**Fig. S3** High-resolution (a) C1s and (b) S2p spectrums of LVPC-S11.6%.

In order to further confirm the effects of S doping amount on the variation of chemical bonding between carbon and sulfur in carbon coated layer, X-ray photoemission spectroscopy (XPS) studies of LVPC-S11.6% were also carried out. **Fig. S3a** displays the high-resolution C1s spectrum of LVPC-S11.6%, the C1s peak of  $sp^2$  carbon is also appeared at 284.6 eV; however, compared with LVPC (Fig. 3c), a fitted peak of C-S bond is also appeared at 268.5 eV on C1s spectrum of LVPC-S11.6%, which further proves the successful S-doping in carbon coated layer.<sup>S1,S2</sup> Furthermore, compared with LVPC, because of the introduction of C-S bond, the C1s peak of LVPC-S11.6% also broadens obviously. **Fig. S3b** exhibits the high-resolution S2p spectrum of LVPC-S11.6%, there are three main peaks existed in that of LVPC-S11.6% at the binding energies of 163.6, 165.2 and 168.5 eV. Two fitted peaks at 163.6 (S1) and 165.2 eV (S2), respectively, are in agreement with the  $S2p_{3/2}$  and  $S2p_{1/2}$  of the  $-S-C-S-$  covalent bond of the thiophene-S owing to their spin-orbit couplings.<sup>S3,S4</sup> The fitted peak at 268.5 eV (S3) should be assigned to the sulfate ( $-C-SO_4-C-$ ) or sulfonate ( $-C-SO_3-C-$ )<sup>S5-S7</sup>. When carefully compared with S2p spectrums of LVPC-S11.1% and LVPC-S11.6% in Fig. 3b and Fig. S3b, respectively; the peak area of the fitted peak at 168.5 eV of LVPC-S11.6% is obviously larger than that of LVPC-S11.1%, which means with the increase of S doping amount in LVPC-S, the doping proportion of the sulfate ( $-C-SO_4-C-$ ) or sulfonate ( $-C-SO_3-C-$ ) increased apparently. The existence of sulfate ( $-C-SO_4-$

C-) and sulfonate (-C-SO<sub>3</sub>-C-) will induce numerous O elements in carbon coated layer which make negative effects on the conductivity and electrochemical activity of carbon coated layer. As a result, the improvement of electrochemical properties will be limited. As a consequence, if S doping amount in the carbon coated layer is inadequate, the doping proportion of thiophene-S will insufficient, therefore, the modification effects of S-doped carbon coating on the electrochemical activity and conductivity of carbon layer will unobvious; On the other hand, if S doping amount in the carbon coated layer is excessive, lots of sulfate (-C-SO<sub>4</sub>-C-) or sulfonate (-C-SO<sub>3</sub>-C-) will existed in carbon layer, which will make negative effects on the electrochemical properties of LVPC-S samples. In other word, if the S doping amount in the carbon coated layer of Li<sub>3</sub>V<sub>2</sub>(PO<sub>4</sub>)<sub>3</sub> is moderate, S-doped carbon coating approach can make the most positive effects on the electrochemical properties of Li<sub>3</sub>V<sub>2</sub>(PO<sub>4</sub>)<sub>3</sub> cathode materials.

## References

- S1 H. L. Poh, P. Simek, Z. Sofer and M. Pumera, *ACSnano*, 2013, **7**, 5262.
- S2 A. D. Vogt, T. Han and T. P. Beebe, *Langmuir*, 1997, **13**, 3397.
- S3 S. Yang, L. Zhi, K. Tang, X. Feng, J. Maier and K. Müllen, *Adv. Funct. Mater.*, 2012, **22**, 3634.
- S4 Y. Xia, Y. Zhu and Y. Tang, *Carbon*, 2012 **50**, 5543.
- S5 W. Kicinski and A. Dziura, *Carbon*, 2014, **75**, 56.
- S6 Y. Yan, Y. X. Yin, S. Xin, Y. G. Guo and L. J. Wan, *Chem. Commun.*, 2012, **48**, 10663.
- S7 Y. Wu, S. Fang, Y. Jiang and R. Holze, *J. Power Sources*, 2002, **108**, 245.
